# Supplementary material for: NLRP3 inflammasome-mediated choroid plexus hypersecretion contributes to hydrocephalus after intraventricular hemorrhage via phosphorylated NKCC1 channels
Source: PubMed Central journal article supplement (PMC9210649; doi:10.1186/s12974-022-02530-x), 2022-06-21
Supplement: 12974_2022_2530_MOESM1_ESM.pdf [file 12974_2022_2530_MOESM1_ESM.pdf]

## Figure 2

2B: 3day sham vs. IVH  $P < 0.0001$ ; sham vs. ICH-IVH  $P < 0.0001$ ; IVH vs. ICH-IVH  $P = 0.04$ .

7day sham vs. IVH  $P < 0.0001$ ; sham vs. ICH-IVH  $P < 0.0001$ ; IVH vs. ICH-IVH  $P = 0.015$ .

2C: 3day sham vs. IVH  $P = 0.0001$ ; sham vs. ICH-IVH  $P < 0.0001$ ; IVH vs. ICH-IVH  $P = 0.024$ .

7day sham vs. IVH  $P = 0.0002$ ; sham vs. ICH-IVH  $P = 0.0008$ ; IVH vs. ICH-IVH  $P = 0.5404$ .

2E: 0day sham vs. IVH  $P = 0.89$ ; sham vs. ICH-IVH  $P = 0.99$ ; IVH vs. ICH-IVH  $P = 0.89$ .

1day sham vs. IVH  $P = 0.1514$ ; sham vs. ICH-IVH  $P = 0.0454$ ; IVH vs. ICH-IVH  $P = 0.85$ .

3day sham vs. IVH  $P = 0.0383$ ; sham vs. ICH-IVH  $P = 0.0006$ ; IVH vs. ICH-IVH  $P = 0.015$ .

7day sham vs. IVH  $P = 0.0032$ ; sham vs. ICH-IVH  $P = 0.0002$ ; IVH vs. ICH-IVH  $P = 0.0128$ .

2F: 0day sham vs. IVH  $P = 0.42$ ; sham vs. ICH-IVH  $P = 0.71$ ; IVH vs. ICH-IVH  $P = 0.87$ .

1day sham vs. IVH  $P < 0.0001$ ; sham vs. ICH-IVH  $P < 0.0001$ ; IVH vs. ICH-IVH  $P = 0.02$ .

3day sham vs. IVH  $P < 0.0001$ ; sham vs. ICH-IVH  $P < 0.0001$ ; IVH vs. ICH-IVH  $P = 0.03$ .

7day sham vs. IVH  $P < 0.0001$ ; sham vs. ICH-IVH  $P < 0.0001$ ; IVH vs. ICH-IVH  $P = 0.91$ .

2G: 0day sham vs. IVH  $P = 0.89$ ; sham vs. ICH-IVH  $P = 0.89$ ; IVH vs. ICH-IVH  $P = 0.65$ .

1day sham vs. IVH  $P < 0.0001$ ; sham vs. ICH-IVH  $P < 0.0001$ ; IVH vs. ICH-IVH  $P = 0.97$ .

3day sham vs. IVH  $P < 0.0001$ ; sham vs. ICH-IVH  $P < 0.0001$ ; IVH vs. ICH-IVH  $P = 0.46$ .

7day sham vs. IVH  $P < 0.0001$ ; sham vs. ICH-IVH  $P < 0.0001$ ; IVH vs. ICH-IVH  $P = 0.97$ .

## Figure 4

4A: sham vs. 1day  $P = 0.028$ ; sham vs. 3day  $P < 0.0001$ ; sham vs. 7day  $P = 0.048$ ; 1day vs. 3day  $P = 0.022$ ; 3day vs. 7day  $P = 0.0017$ ;

## Figure 5

5B: ICH-IVH vs. MCC950  $P = 0.0096$ ; ICH-IVH vs. NLRP3<sup>-/-</sup>  $P = 0.0001$ ; MCC950 vs. MSU  $P = 0.032$ .

5C: ICH-IVH vs. MCC950  $P = 0.0038$ ; ICH-IVH vs. NLRP3<sup>-/-</sup>  $P < 0.0001$ ; MCC950 vs. MSU  $P = 0.015$ .

5F: sham vs. ICH-IVH  $P < 0.0001$ ; ICH-IVH vs. MCC950  $P < 0.0001$ ; MCC950 vs. MSU  $P = 0.032$ .

5G: sham vs. ICH-IVH  $P < 0.0001$ ; ICH-IVH vs. MCC950  $P = 0.0002$ ; MCC950 vs. MSU  $P = 0.033$ .

5H: sham vs. ICH-IVH  $P < 0.0001$ ; ICH-IVH vs. MCC950  $P < 0.0001$ ; MCC950 vs. MSU  $P = 0.018$ .

5I: WT vs. NLRP3<sup>-/-</sup>: IL-1beta  $P < 0.0001$ ; NLRP3  $P < 0.0001$ ; Caspase-1  $P < 0.0001$ .

5J: ICH-IVH vs. MCC950  $P = 0.0002$ ; ICH-IVH vs. NLRP3<sup>-/-</sup>  $P < 0.0001$ ; MCC950 vs. MSU  $P = 0.002$ .

5K: ICH-IVH vs. MCC950  $P=0.0095$ ; ICH-IVH vs.  $NLRP3^{-/-}$   $P<0.0001$ ; MCC950 vs. MSU  $P=0.035$ .  
5L: ICH-IVH vs. MCC950  $P<0.0001$ ; ICH-IVH vs.  $NLRP3^{-/-}$   $P<0.0001$ ; MCC950 vs. MSU  
 $P=0.0013$ .

### Figure 6

6C: sham vs. ICH-IVH  $P<0.0001$ ; ICH-IVH vs. MCC950  $P<0.0001$ .

6D: sham vs. ICH-IVH  $P<0.0001$ ; ICH-IVH vs. MCC950  $P=0.032$ .

### Figure 7

7C: sham vs. ICH-IVH  $P<0.0001$ ; ICH-IVH vs. MCC950  $P<<0.0001$ ; MCC950 vs. MSU  $P<0.0001$ .

7D: sham vs. ICH-IVH  $P<0.0001$ ; ICH-IVH vs. MCC950  $P<<0.0001$ ; MCC950 vs. MSU  $P=0.0003$ .

7G: WT vs.  $NLRP3^{-/-}$   $P<0.0001$ .

7H: WT vs.  $NLRP3^{-/-}$   $P<0.0001$ .

### Figure 8

8B: Saline vs. Bumetanide  $P<0.001$ .

8D: Saline vs. Bumetanide  $P<0.001$ .

8E: Saline vs. Bumetanide  $P=0.21$ .

8F: Saline vs. Bumetanide  $P<0.001$ .

### Figure 9

9B:  $NLRP3$ : sham vs. LPS  $P<0.0001$ ; sham vs. Lysis-RBC+MCC950  $P=0.024$ ; LPS vs. Lysis-RBC  
 $P=0.009$ ; Lysis-RBC vs. Lysis-RBC+MCC950  $P<0.0001$

$p$ -NKCC1: sham vs. LPS  $P<0.0001$ ; sham vs. Lysis-RBC+MCC950  $P=0.18$ ; LPS vs. Lysis-RBC  
 $P=0.105$ ; Lysis-RBC vs. Lysis-RBC+MCC950  $P<0.0001$ .

9D: sham vs. LPS  $P=0.0042$ ; sham vs. Lysis-RBC+MCC950  $P=0.55$ ; LPS vs. Lysis-RBC  $P=0.001$ ;  
Lysis-RBC vs. Lysis-RBC+MCC950  $P<0.0001$ .

9E: sham vs. LPS  $P<0.0001$ ; sham vs. Lysis-RBC+MCC950  $P=0.035$ ; LPS vs. Lysis-RBC  $P=0.007$ ;  
Lysis-RBC vs. Lysis-RBC+MCC950  $P<0.0001$ .

**Figure 10**

10B: sham vs. LPS  $P=0.0025$ ; Lysis-RBC vs. Lysis-RBC+MCC950  $P=0.0058$ .

10C: sham vs. LPS  $P=0.0003$ ; Lysis-RBC vs. Lysis-RBC+MCC950  $P=0.0092$ .

10F: sham vs. LPS  $P<0.0001$ ; sham vs. Lysis-RBC  $P<0.0001$ ; Lysis-RBC vs. Lysis-RBC+MCC950  $P<0.0001$ .

10G: sham vs. LPS  $P=0.0001$ ; sham vs. Lysis-RBC  $P<0.0001$ ; Lysis-RBC vs. Lysis-RBC+MCC950  $P<0.0001$ .
